# Supplementary material for: Photochromic inorganic–organic hybrid: a new approach for switchable photoluminescence in the solid state and partial photochromic phenomenon
Source: Royal Society of Chemistry journal article supplement (doi:10.1039/c0dt00471e), 2010-01-01
Supplement: c0dt00471e.pdf [file c0dt00471e.pdf]

## Supporting Information

### Photochromic Inorganic-Organic Hybrid: A New Approach for Switchable photoluminescence in the Solid State and Partial Photochromic Phenomenon

Gang Xu,<sup>a</sup> Guo-Cong Guo,<sup>a,\*</sup> Jin-Shuang Guo,<sup>a</sup> Sheng-Ping Guo,<sup>a</sup> Xiao-Ming Jiang,<sup>a</sup> Chen Yang,<sup>a</sup> Ming-Sheng Wang,<sup>a</sup> and Zhang-Jing Zhang<sup>a</sup>

<sup>a</sup> State Key Laboratory of Structural Chemistry, Fujian Institute of Research on the Structure of Matter, Chinese Academy of Sciences, Fuzhou, Fujian 350002, P. R. China

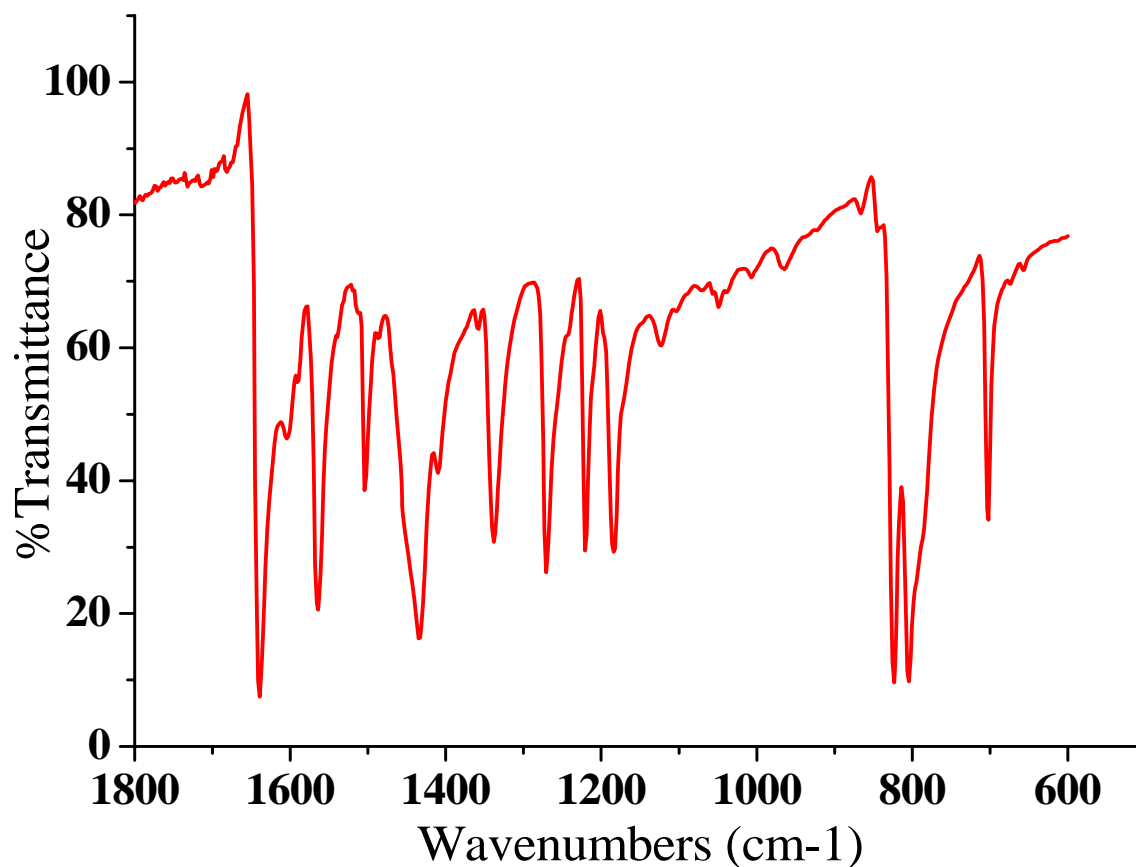

Figure S1. The IR spectrum for **1**.

\* Corresponding author. Tel.: +86 591 83705882; fax: +86 591 83714946.

E-mail address: gcguo@fjirsm.ac.cn (G.-C. Guo).

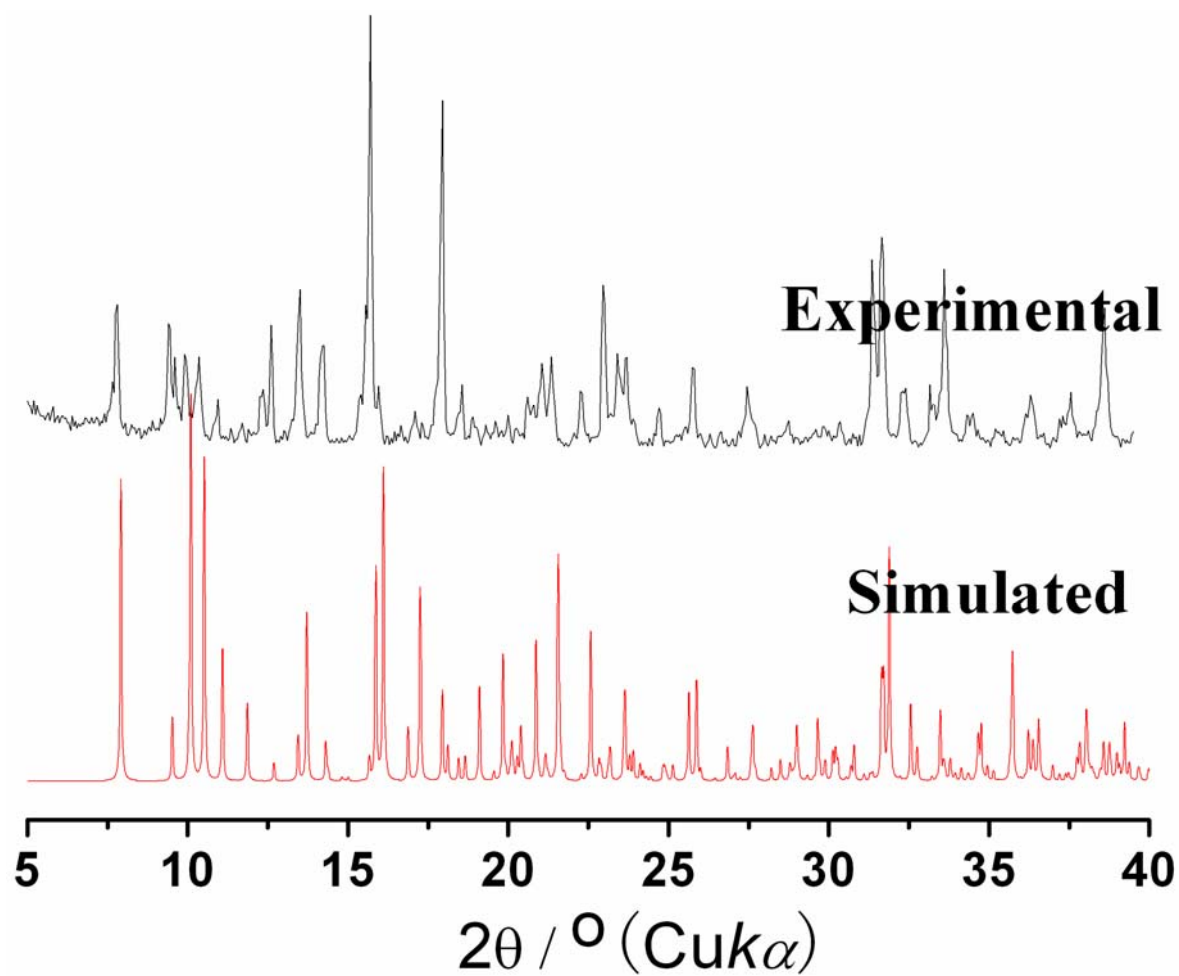

Figure S2. The PXRD patterns for 1.

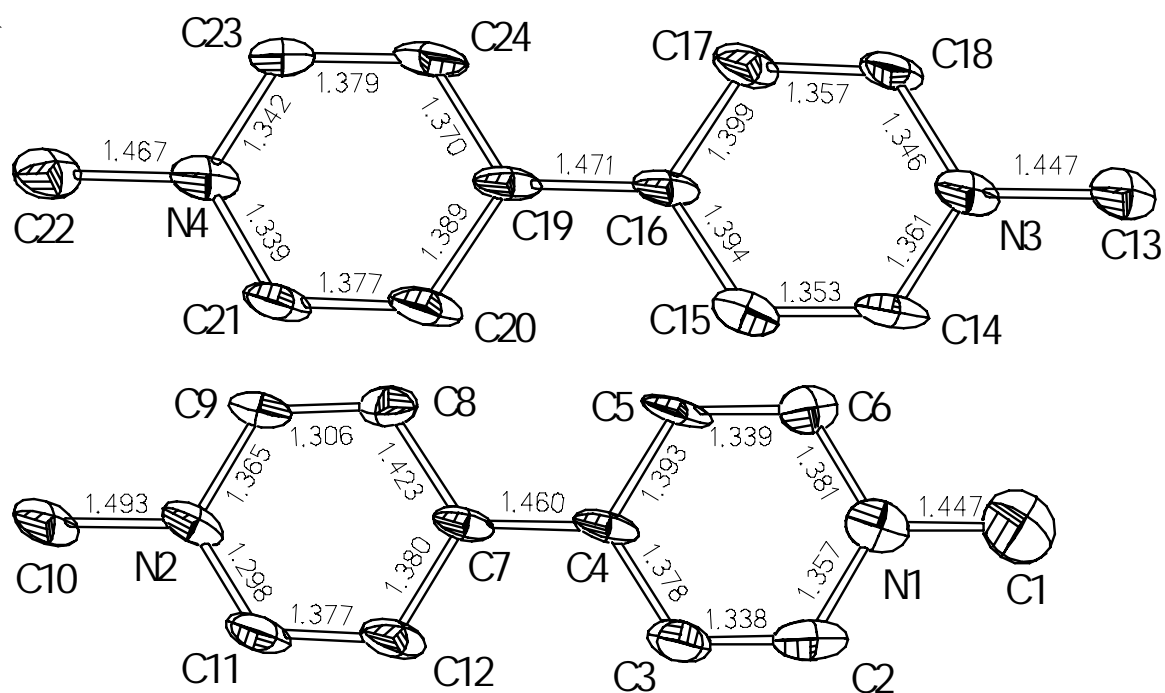

Colourless 1

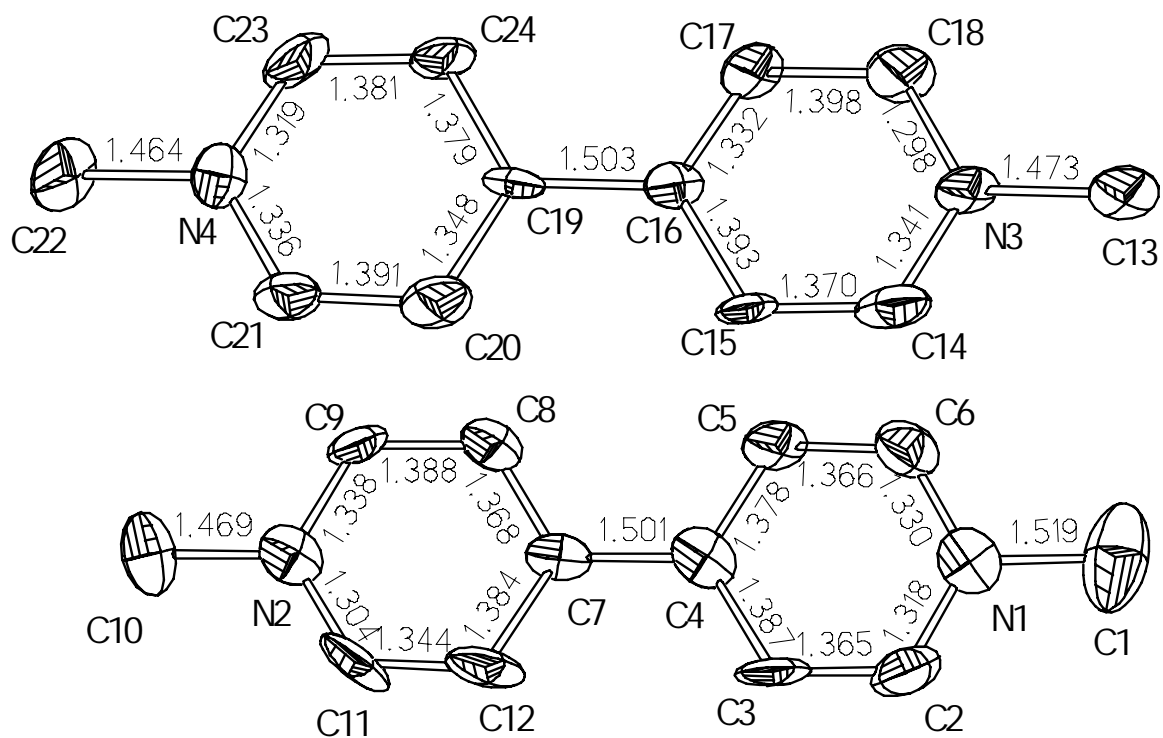

Black 1

Figure S3. Bond lengths of [MV]<sup>2+</sup> of Colourless 1 and Black 1.

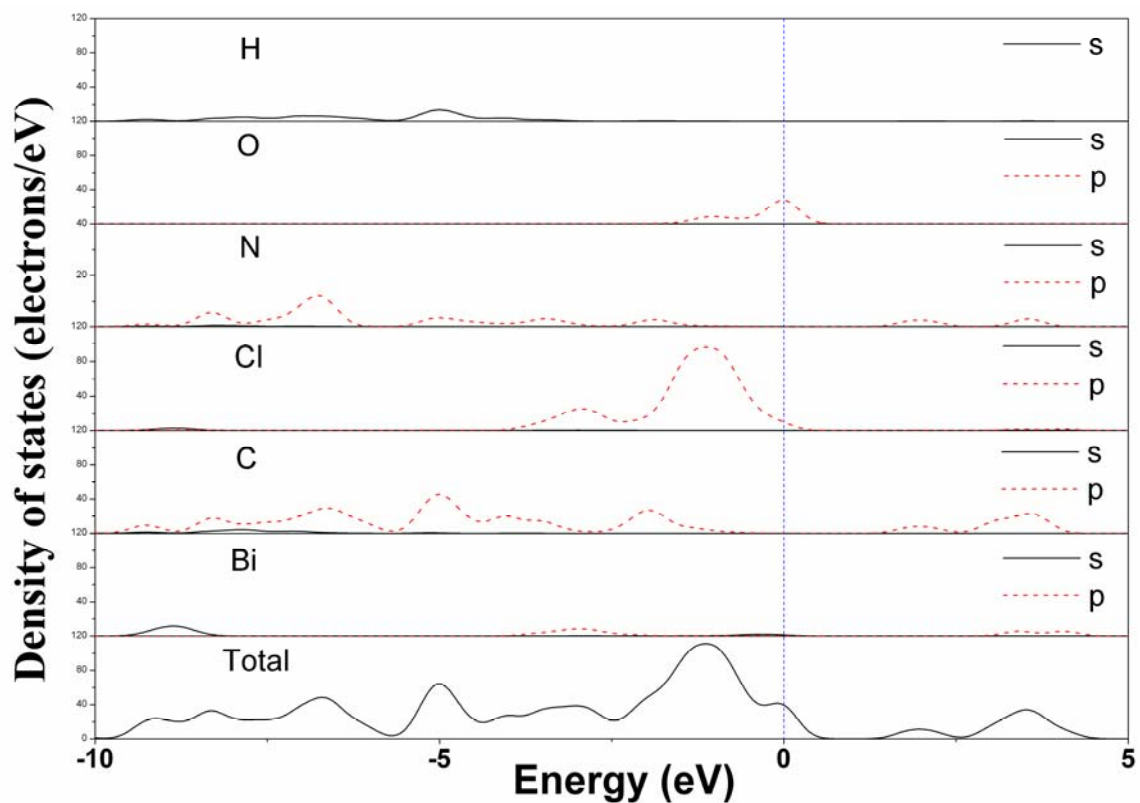

Colourless 1

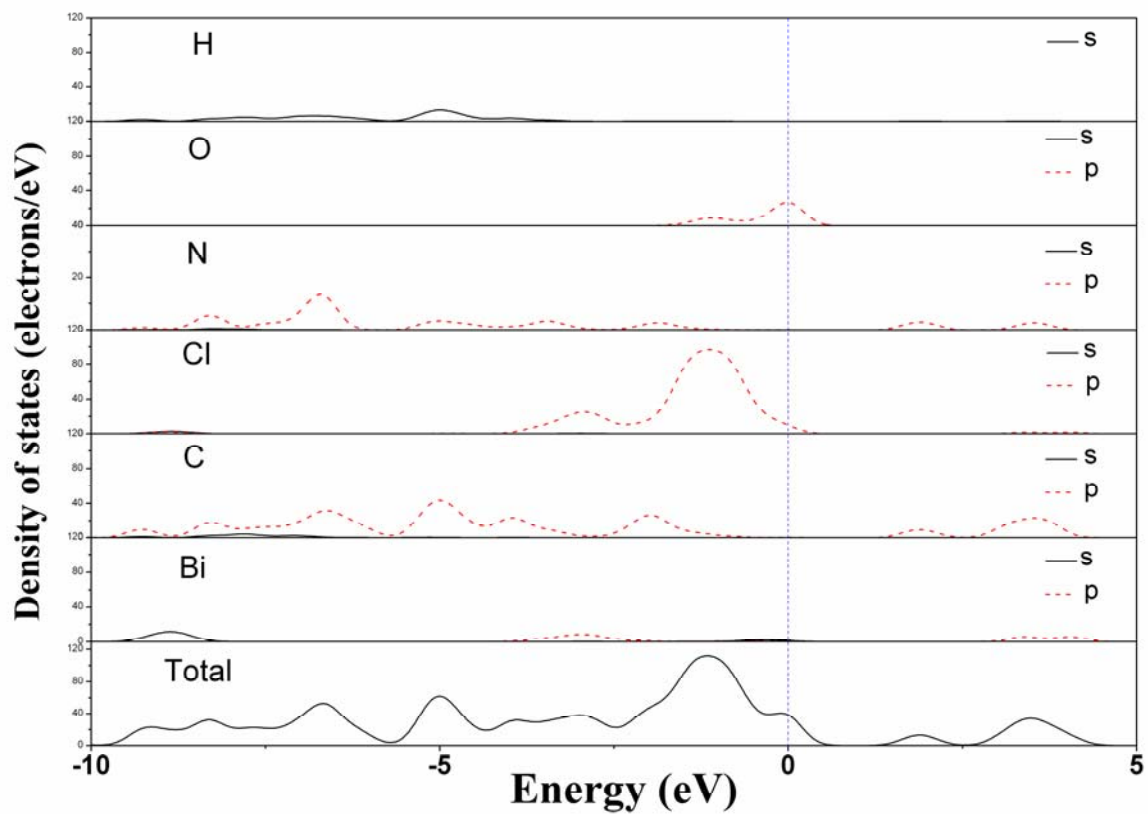

## Yellowish 1

Figure S4. The total and partial DOS of title complex.

Table S1. The intermolecular distances (Å) between inorganic component, organic component and lattice water molecules.

|                     | C...O                            | N...Cl          | C...Cl                                                                                                                                                                 | O...Cl                             |
|---------------------|----------------------------------|-----------------|------------------------------------------------------------------------------------------------------------------------------------------------------------------------|------------------------------------|
| <b>Colourless 1</b> | C1...O1W 3.236<br>C9...O1W 2.881 | N3...Cl11 3.318 | C18...Cl1 3.410<br>C9...Cl3 3.336<br>C4...Cl4 3.368<br>C5...Cl4 3.412<br>C7...Cl4 3.438<br>C19...Cl5 3.446<br>C21...Cl10 3.438<br>C16...Cl12 3.390<br>C19...Cl12 3.372 | O1W...Cl8 3.193<br>O2W...Cl8 3.262 |
| <b>Yellowish 1</b>  | C1...O1W 3.214<br>C9...O1W 3.013 | N3...Cl11 3.350 | C18...Cl1 3.403<br>C9...Cl3 3.299<br>C4...Cl4 3.367<br>C5...Cl4 3.396<br>C7...Cl4 3.440<br>C19...Cl5 3.447<br>C21...Cl10 3.420<br>C16...Cl12 3.405<br>C19...Cl12 3.394 | O1W...Cl8 3.233<br>O2W...Cl8 3.260 |
| <b>Black 1</b>      | C1...O1W 3.196<br>C9...O1W 3.006 | N3...Cl11 3.341 | C18...Cl1 3.425<br>C9...Cl3 3.295<br>C4...Cl4 3.357<br>C5...Cl4 3.394<br>C7...Cl4 3.449<br>C19...Cl5 3.454<br>C21...Cl10 3.443<br>C16...Cl12 3.389<br>C19...Cl12 3.388 | O1W...Cl8 3.262<br>O2W...Cl8 3.231 |
